# Supplementary material
Source: Springer Nature journal article supplement (https://www.springermedizin.de/resource/supplementary/12889_2006_460_MOESM2_ESM.pdf/9500918)
Supplement: MOESM2 [file 9500918]

# Welfare Rights Advice

**Non-financial  
benefits**

**Financial  
benefits**

## **Necessities**

Transport,  
Social activities, Food,  
Paying bills, Heating,  
Extra help, Preventing  
debt, Adaptations to  
home, Blue Badge

## **Occasional expenses**

Furniture/household  
equipment  
  
Day trips/holidays  
  
Special equipment for  
illness/disability

## **Capacity to cope with crises**

Emergencies, Savings

**Maintaining  
independence**

**Ability to participate in  
society**

**Peace of mind**
